# Supplementary material for: The Effects of General Anaesthesia and Light on Behavioural Rhythms and GABAA Receptor Subunit Expression in the Mouse SCN
Source: MDPI journal article supplement (doi:10.3390/clockssleep3030034), 2021-09-17

## Supplementary Materials:

Figure S2: Behavioural actograms of 60 C57BL/6VJU mice exposed to 4 hours of light (400 lux)

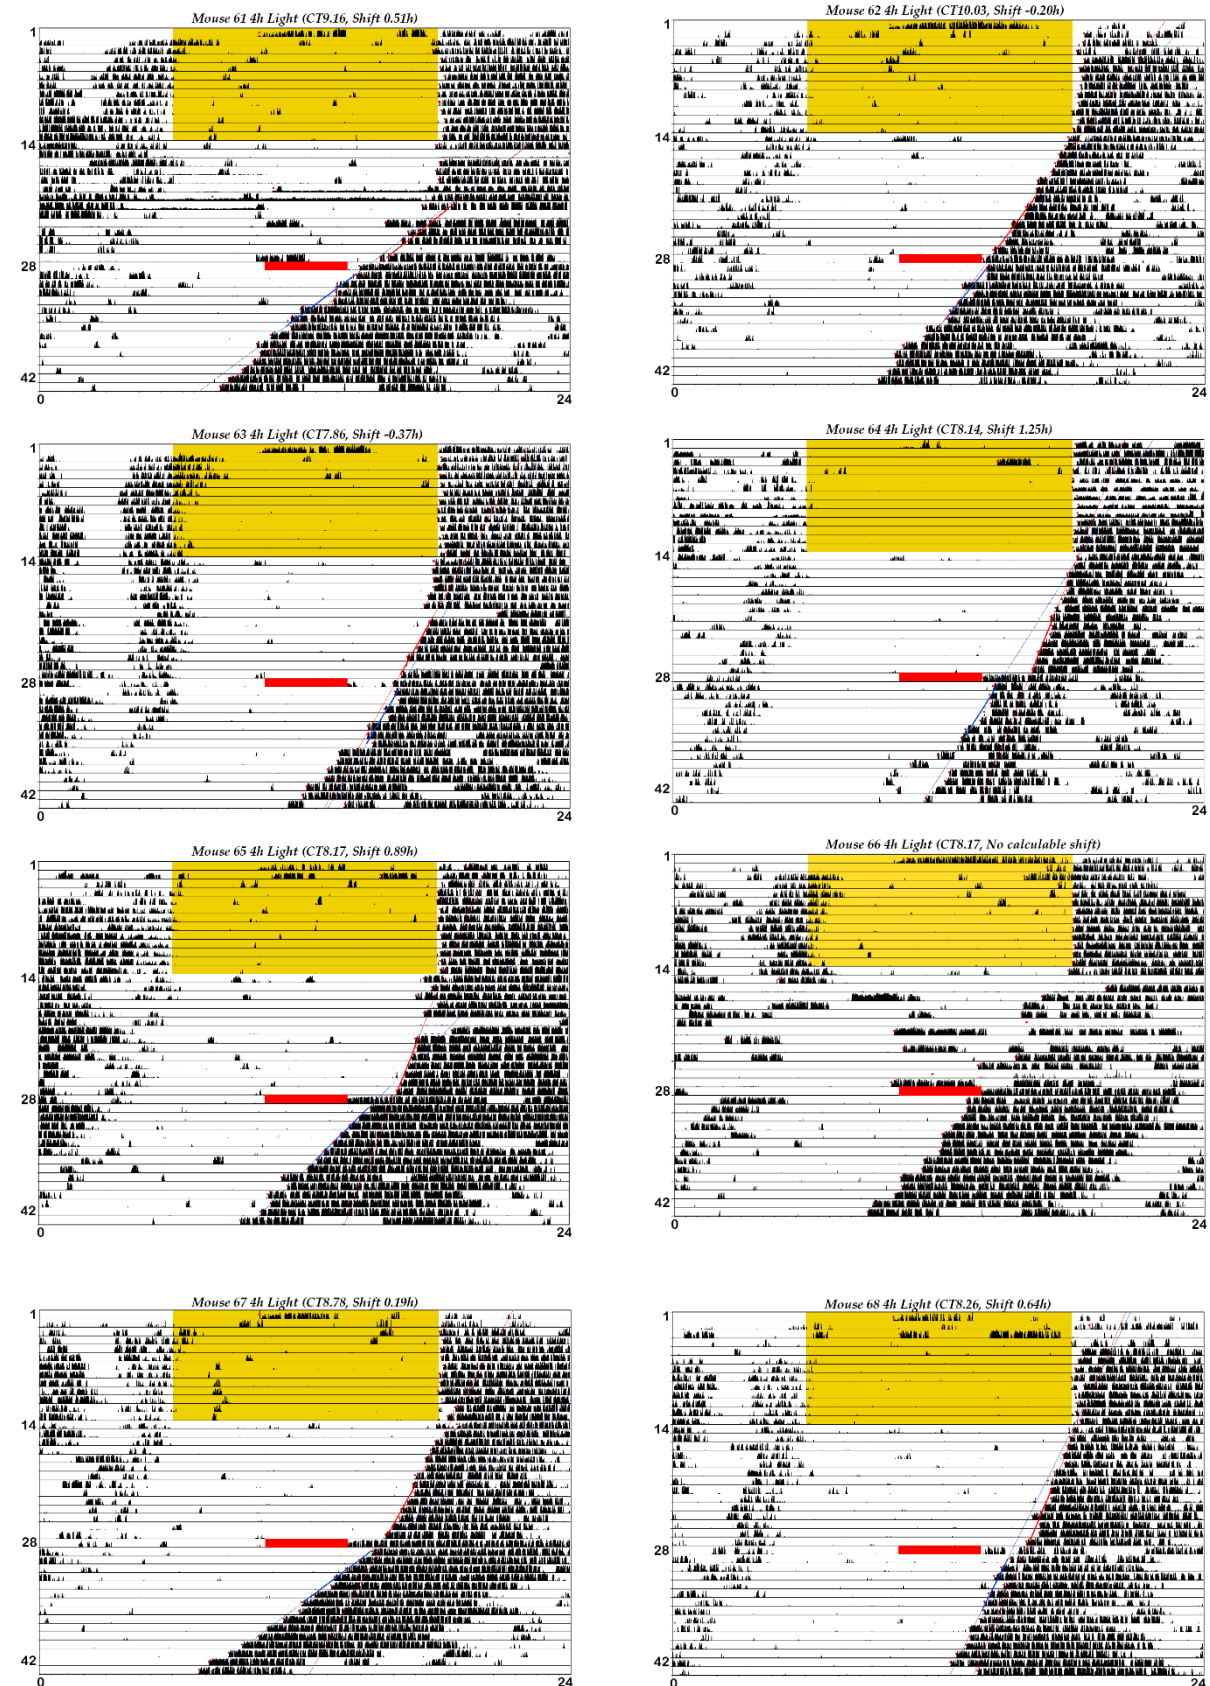

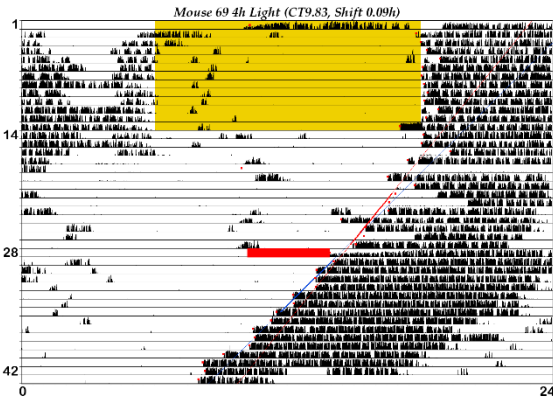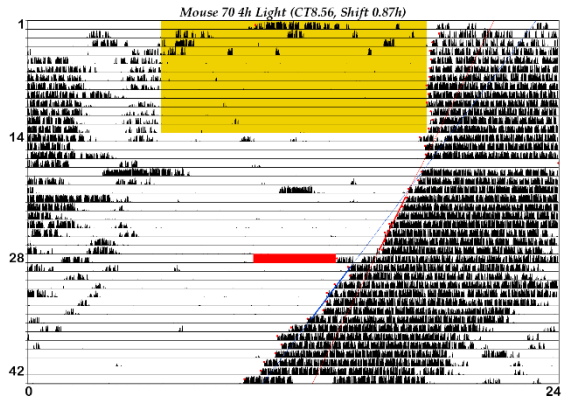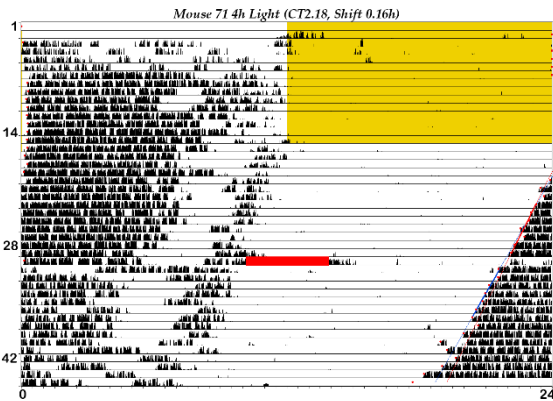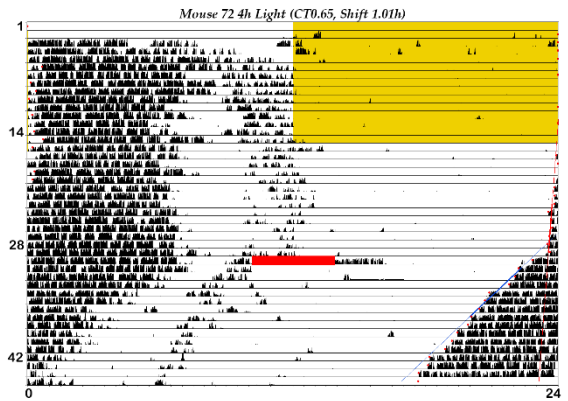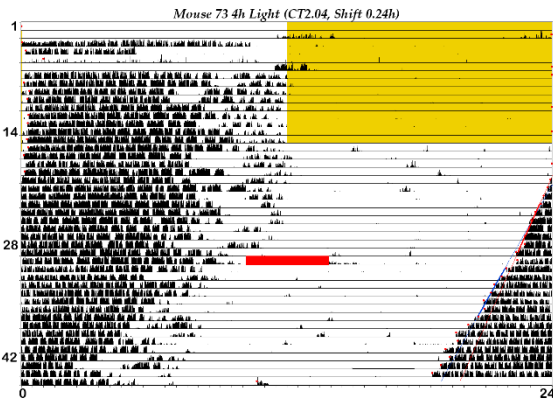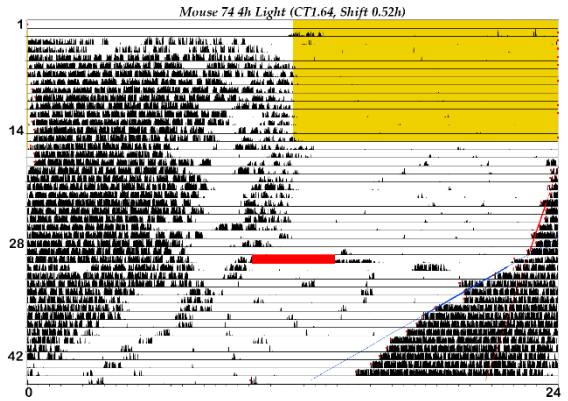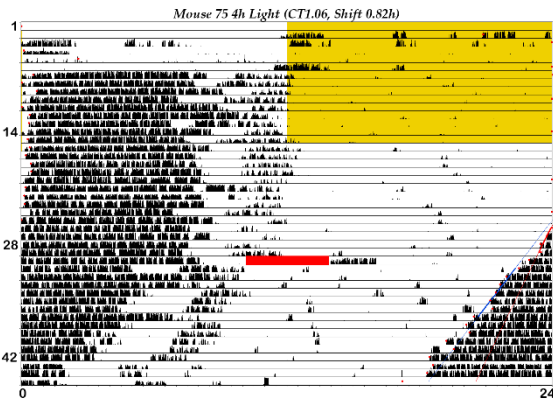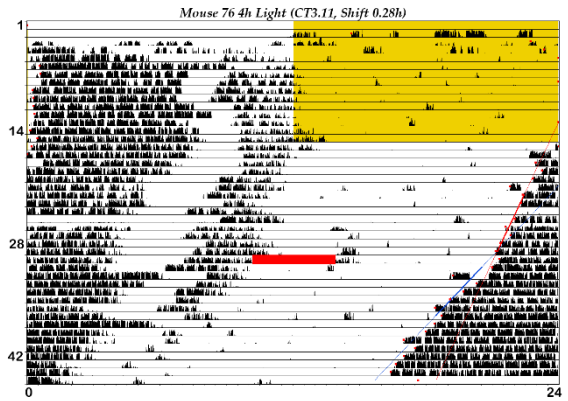

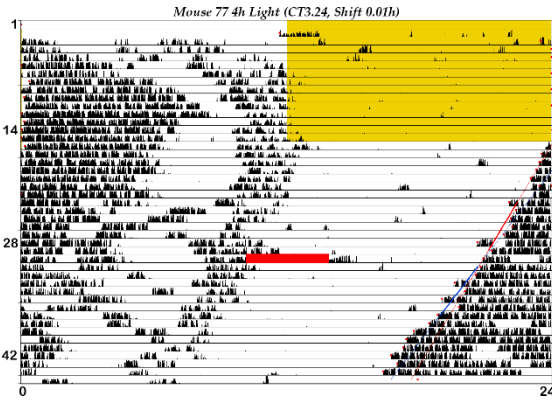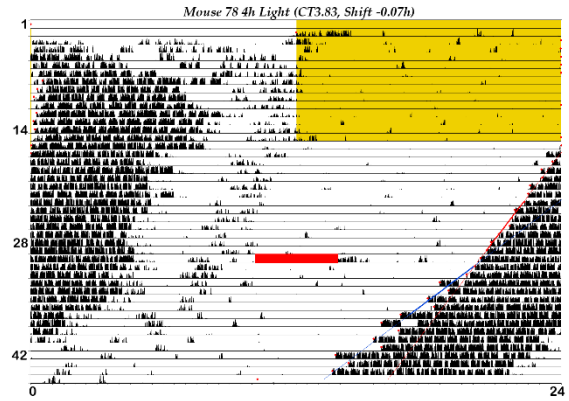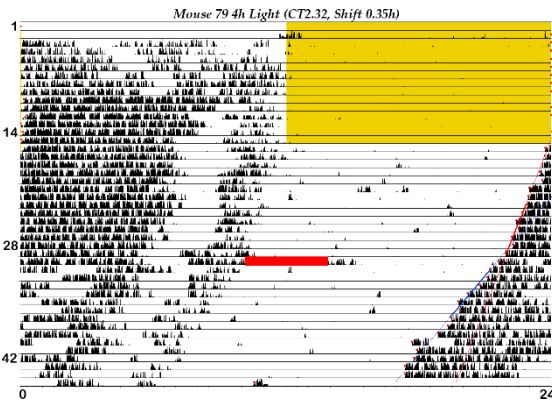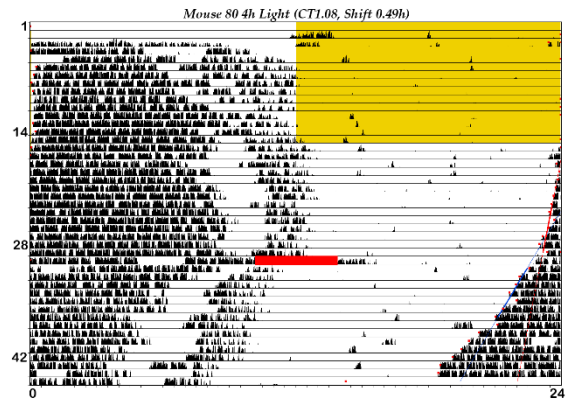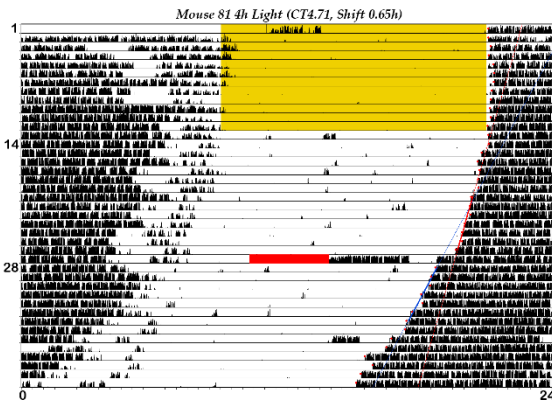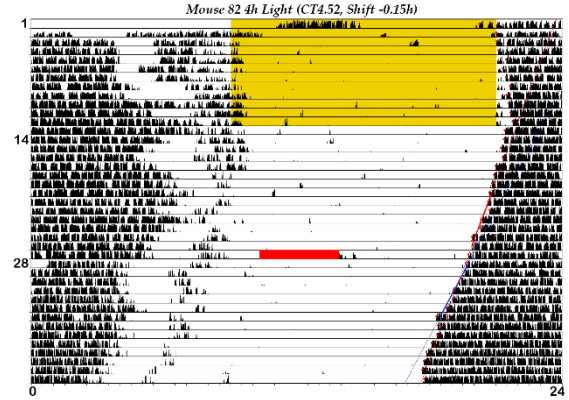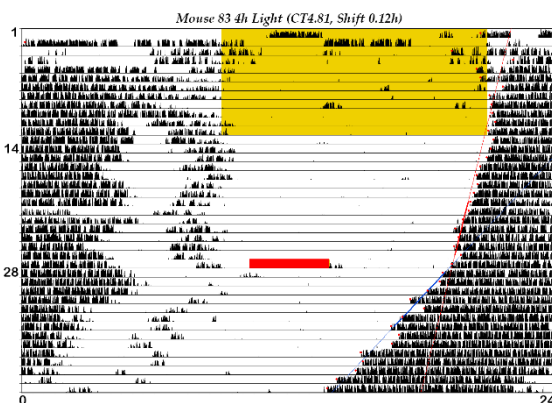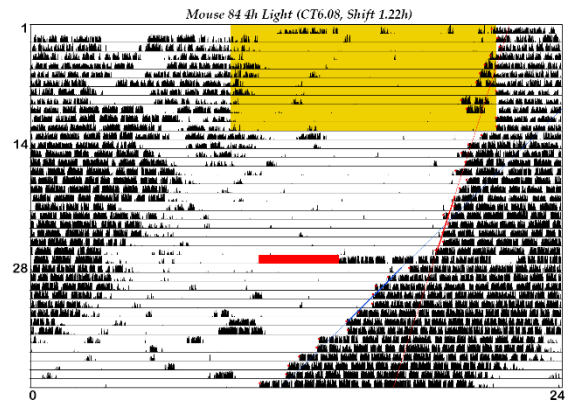



Mouse 85 4h Light (CT5.94, Shift 0.76h)

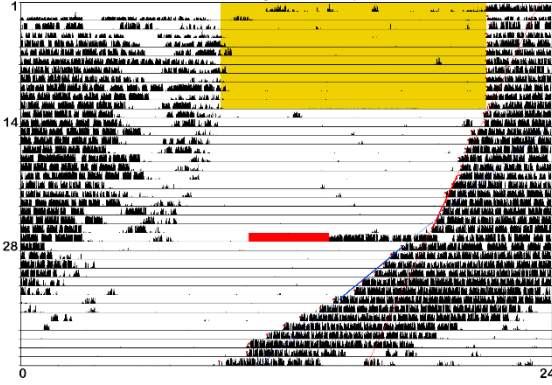

Mouse 86 4h Light (CT6.25, Shift 0.73h)

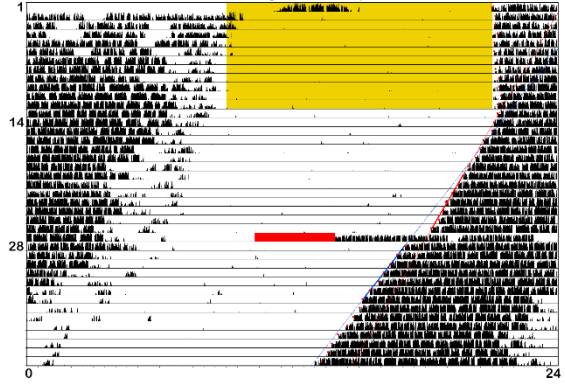

Mouse 87 4h Light (CT6.63, Shift -0.27h)

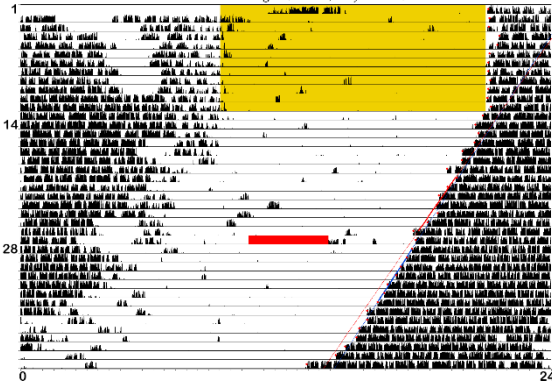

Mouse 88 4h Light (CT7.35, Shift 0.56h)

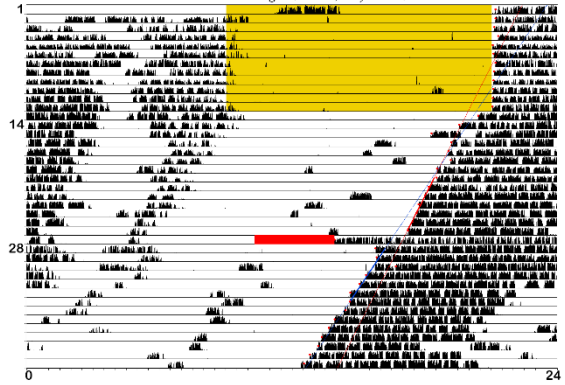

Mouse 89 4h Light (CT6.75, Shift -0.20h)

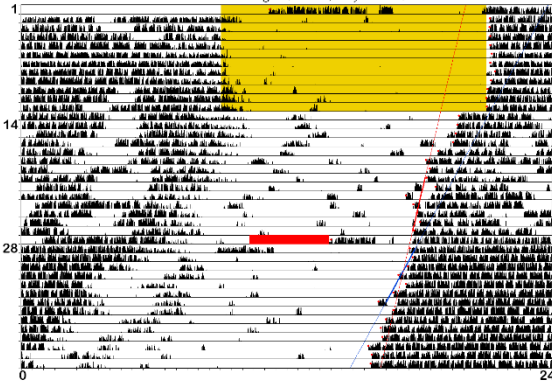

Mouse 90 4h Light (CT4.38, Shift 0.55h)

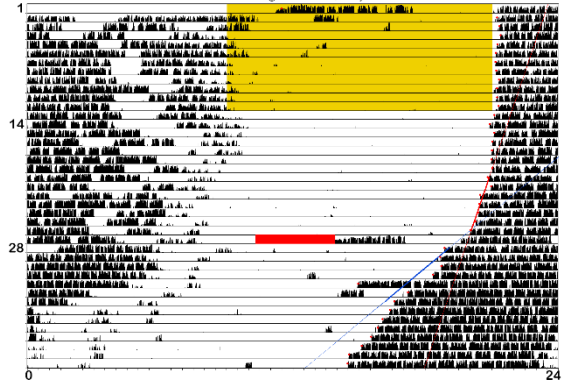

Mouse 91 4h Light (CT22.41, Shift 0.14h)

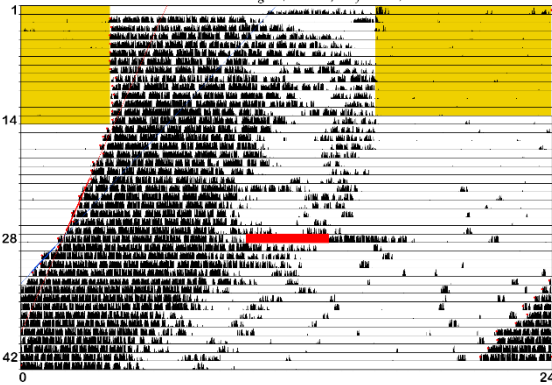

Mouse 92 4h Light (CT18.89, Shift -1.87h)

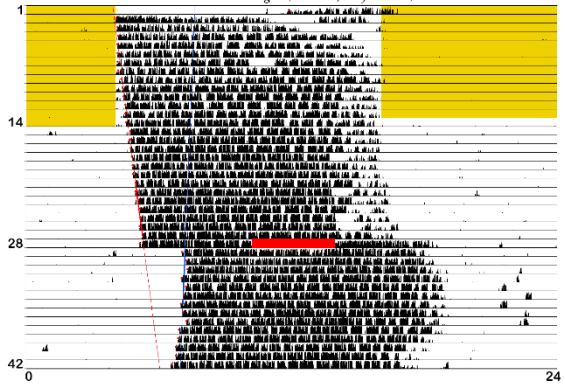

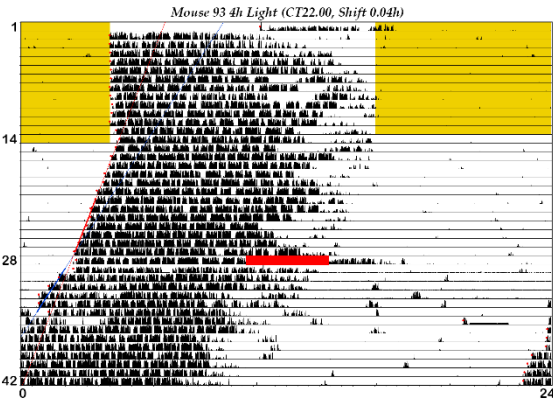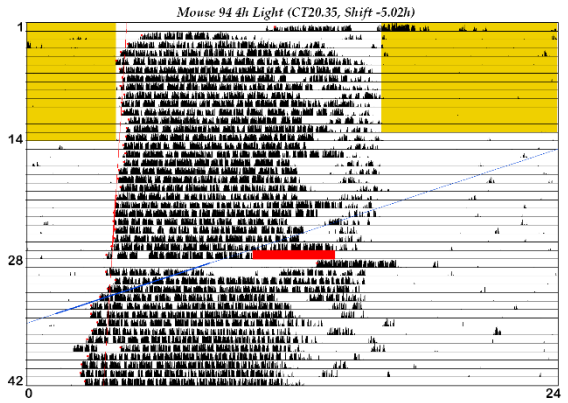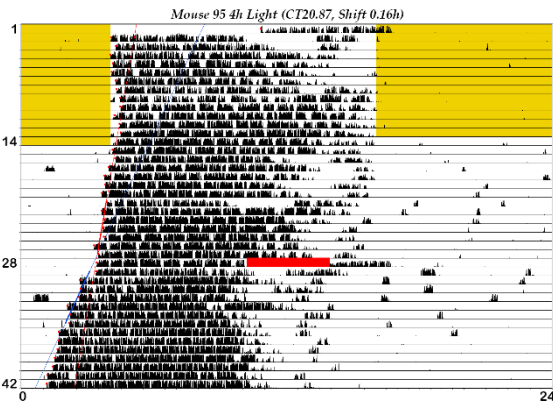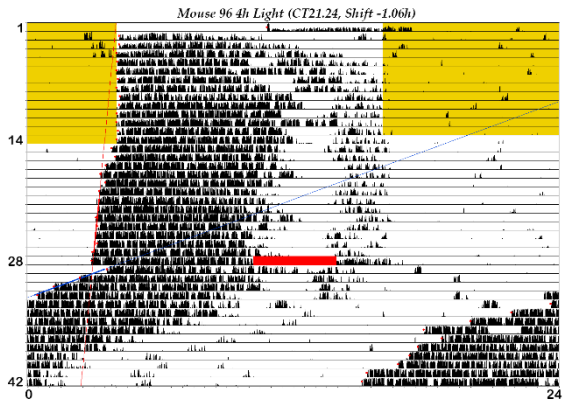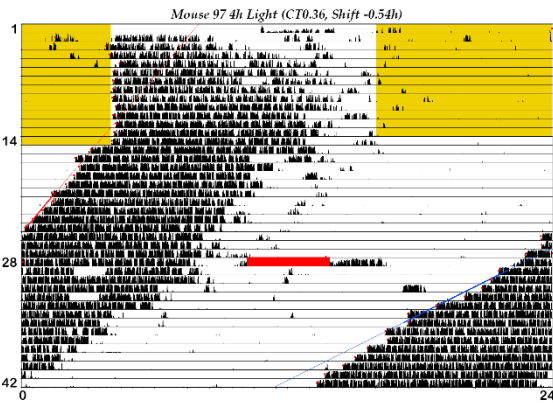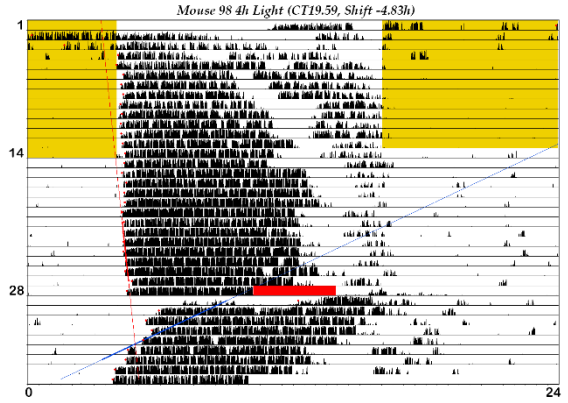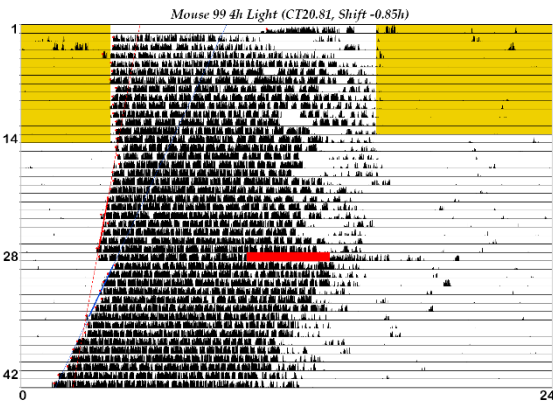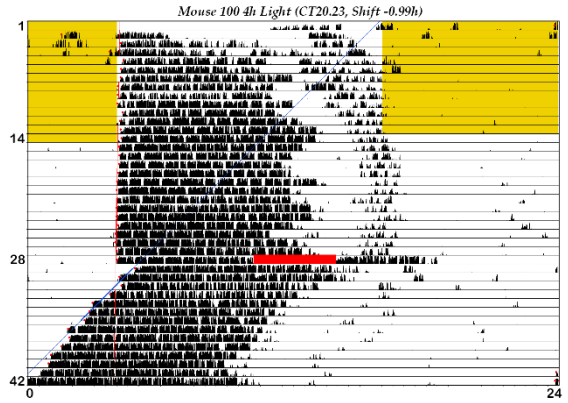

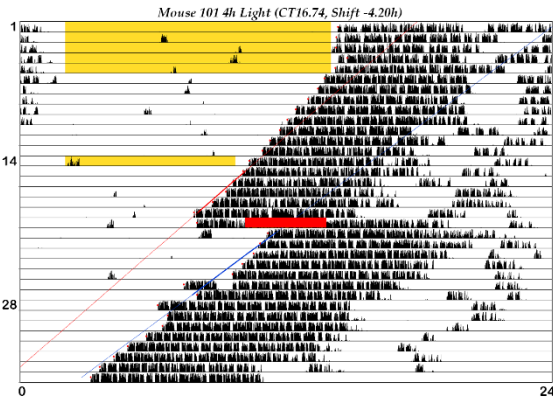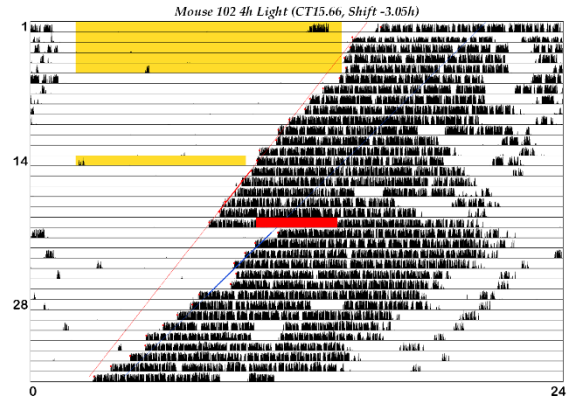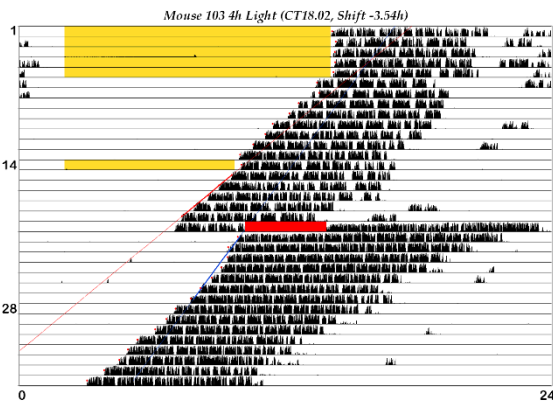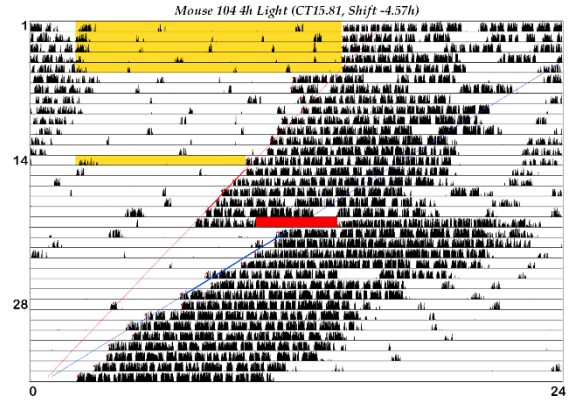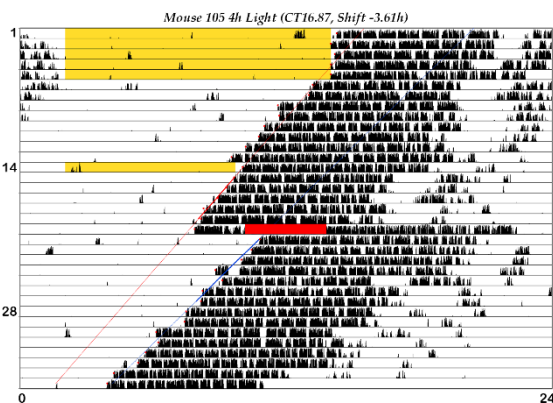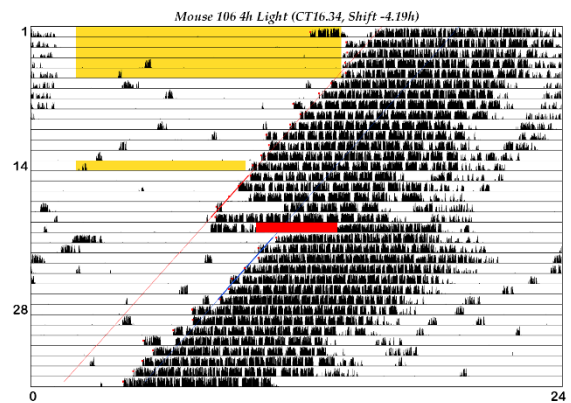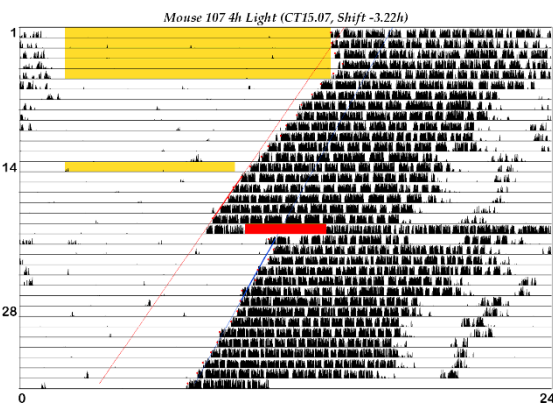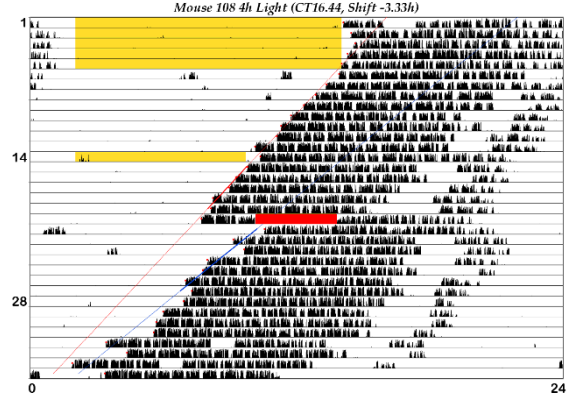



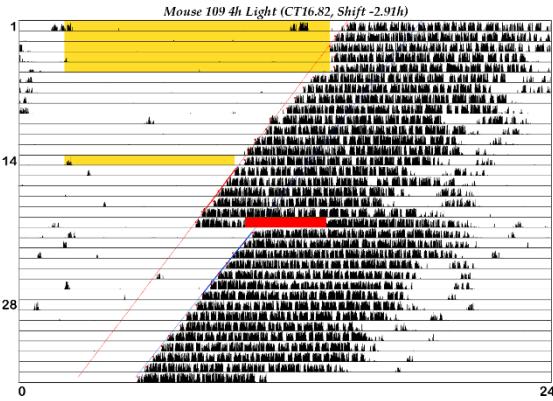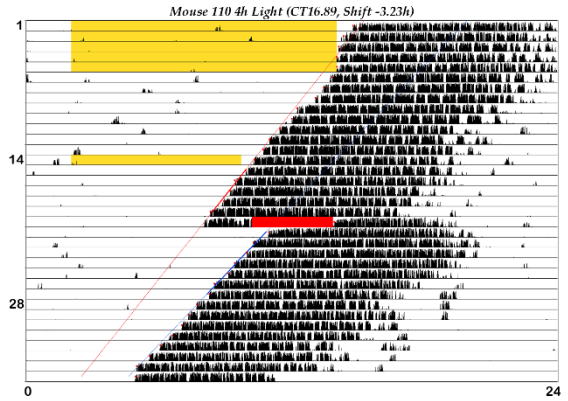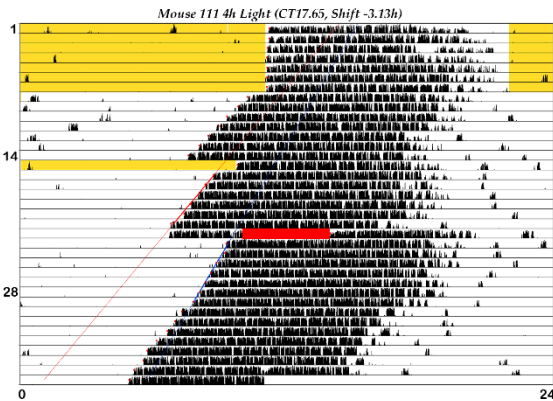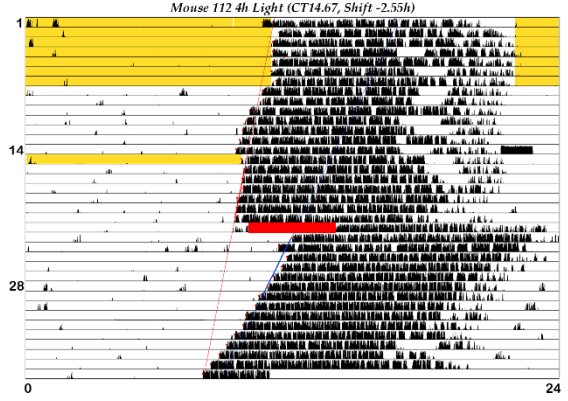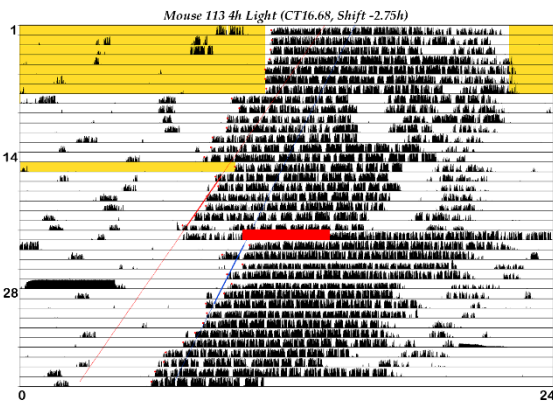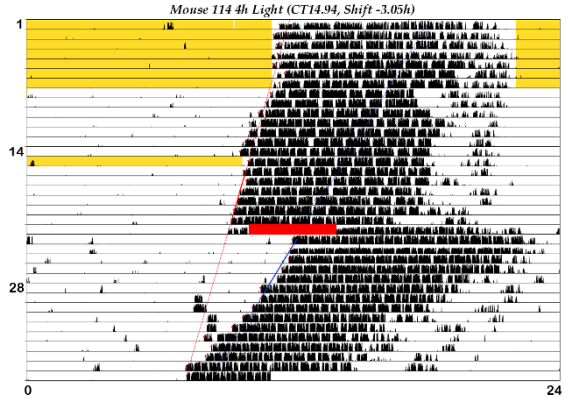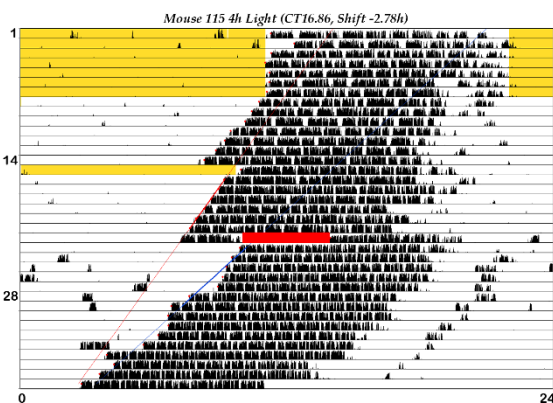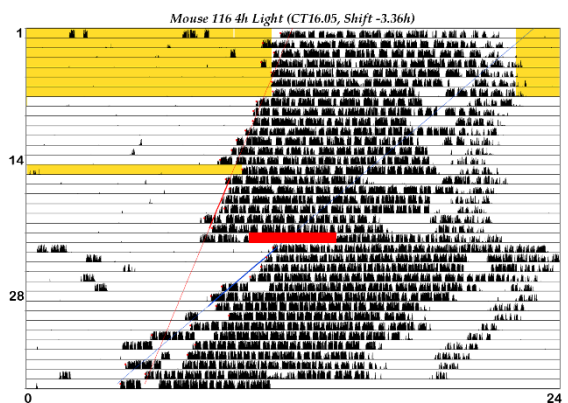

Mouse 117 4h Light (CT-, No calculable shift)

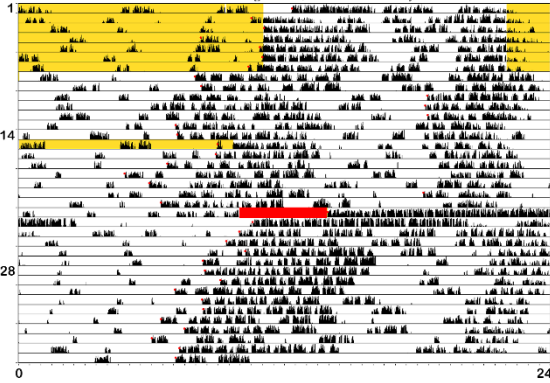

Mouse 118 4h Light (CT18:58, Shift -1.85h)

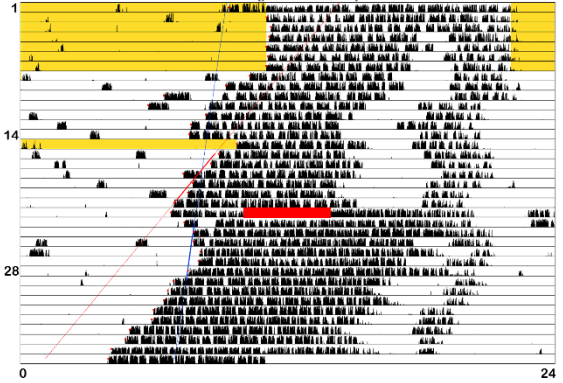

Mouse 119 4h Light (CT18:03, Shift -3.48h)

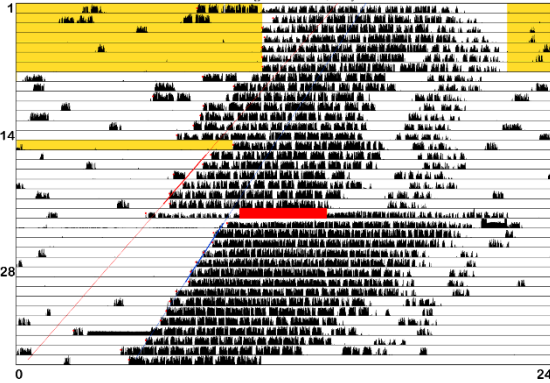

Mouse 120 4h Light (CT15:94, Shift -2.86h)

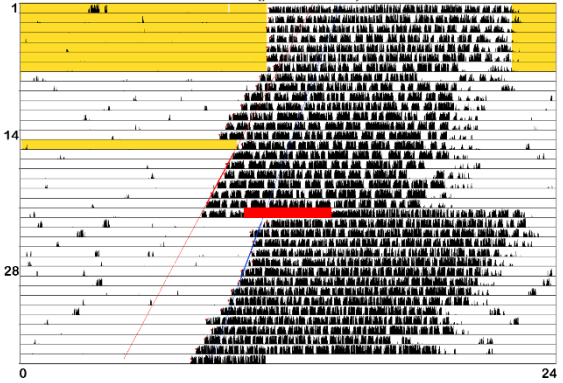

Supplement: s1 [file s1]
