# Supplementary material for: The Effects of General Anaesthesia and Light on Behavioural Rhythms and GABAA Receptor Subunit Expression in the Mouse SCN
Source: MDPI journal article supplement (doi:10.3390/clockssleep3030034), 2021-09-17

## Supplementary Materials:

Figure S1: Behavioural actograms of 60 C57BL/6VJU mice exposed to 4 hours of GA (2% isoflurane) + Light

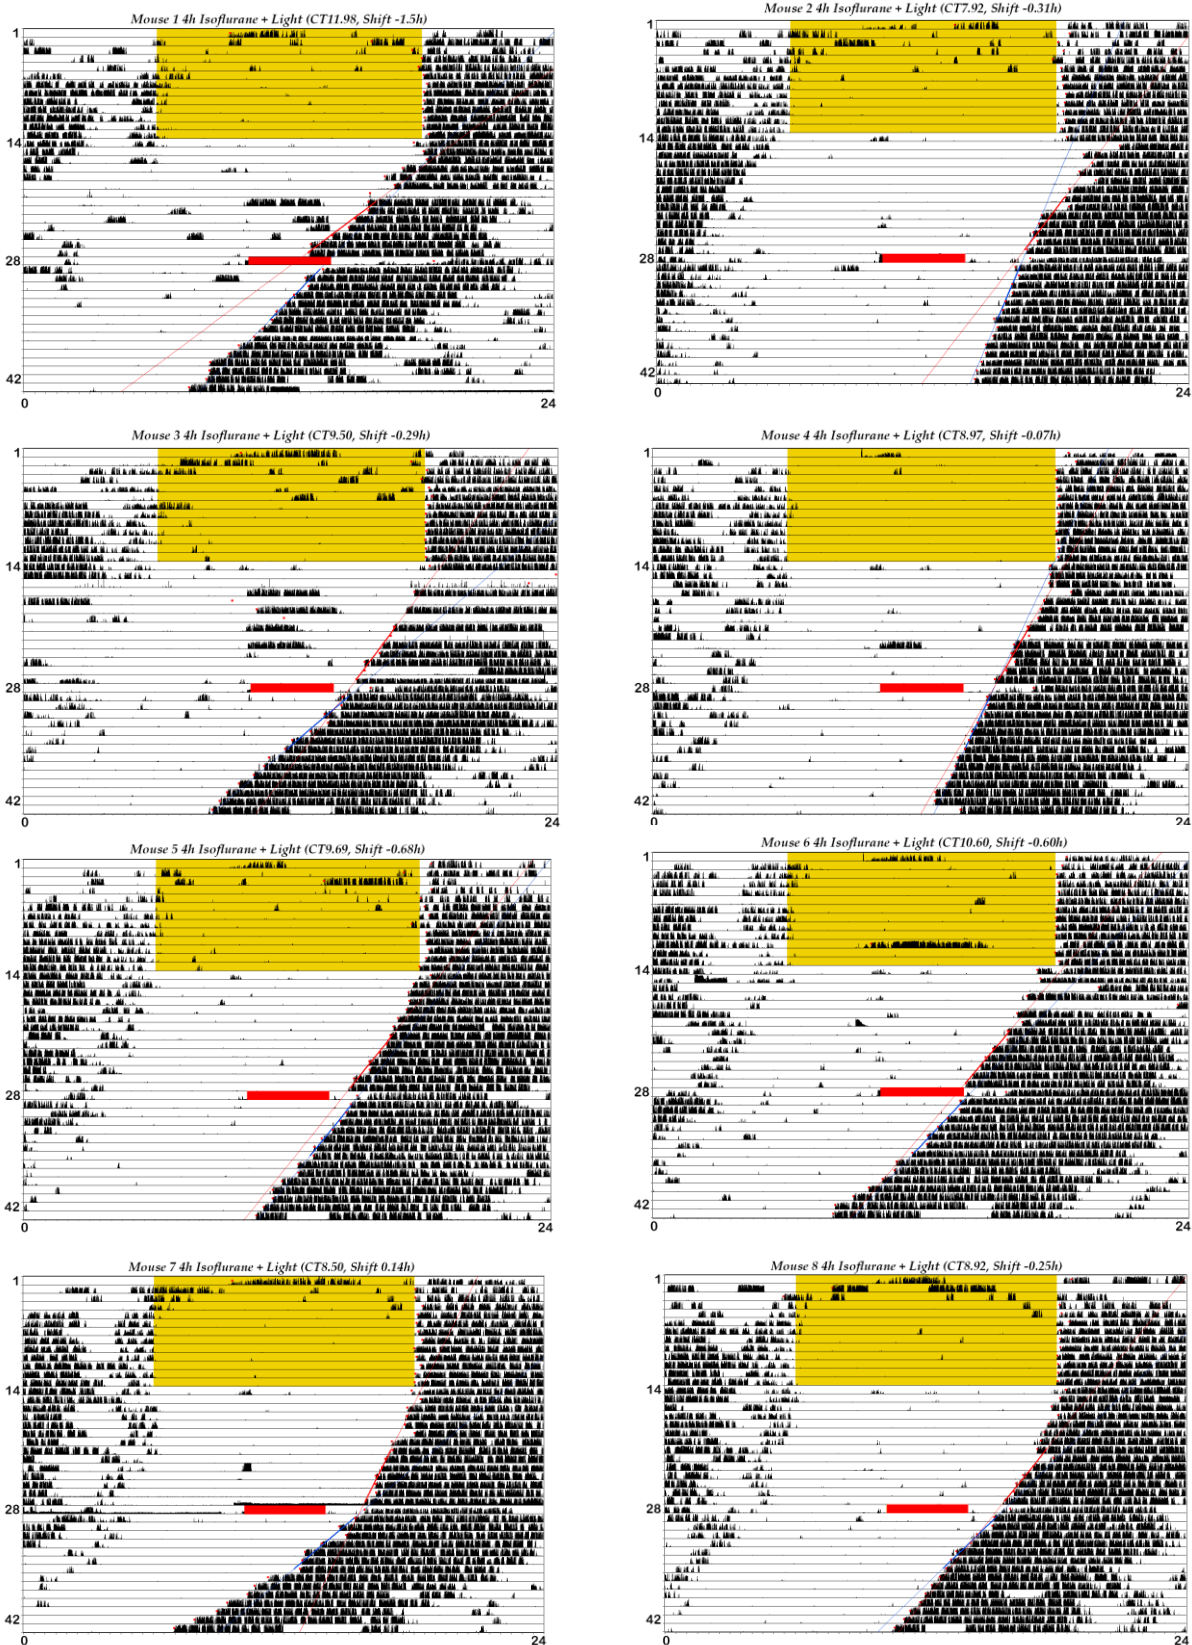

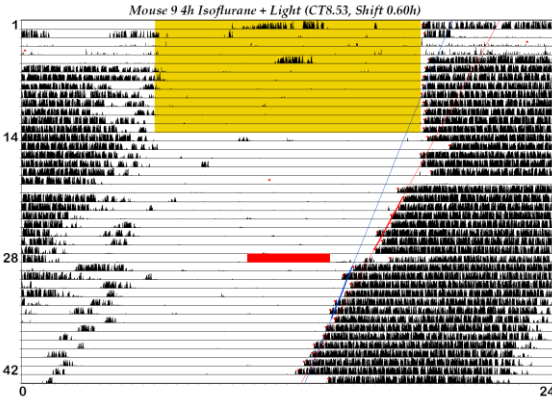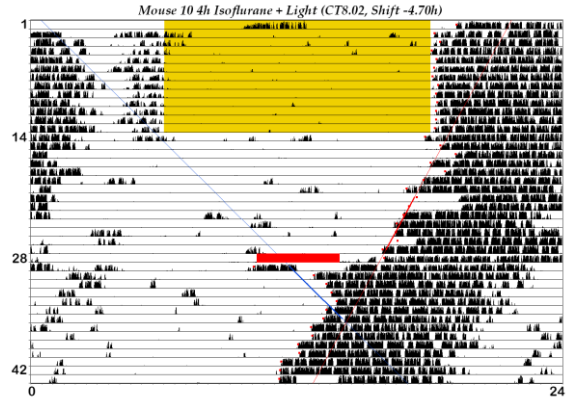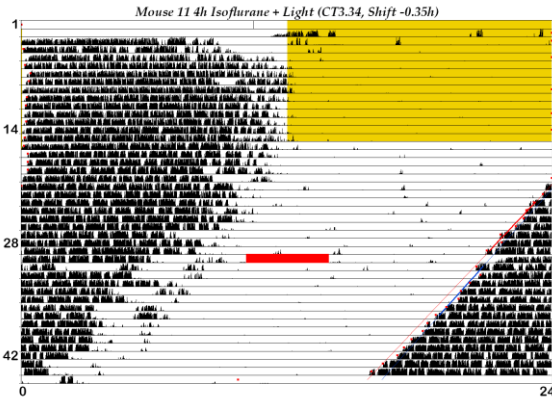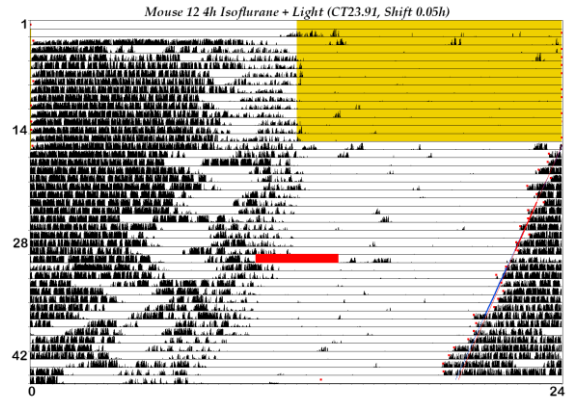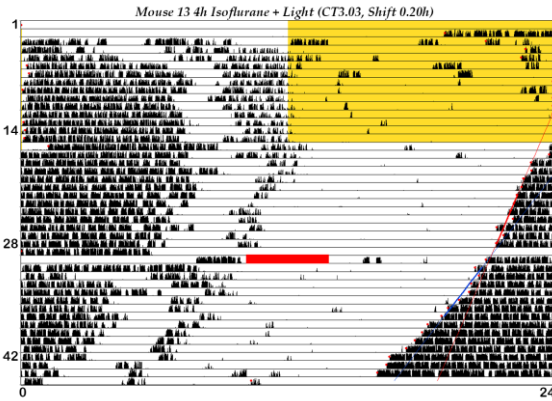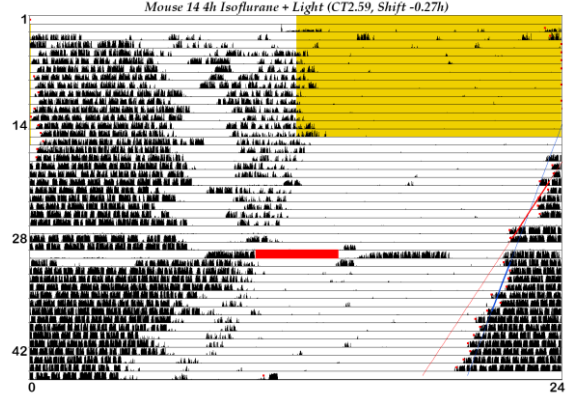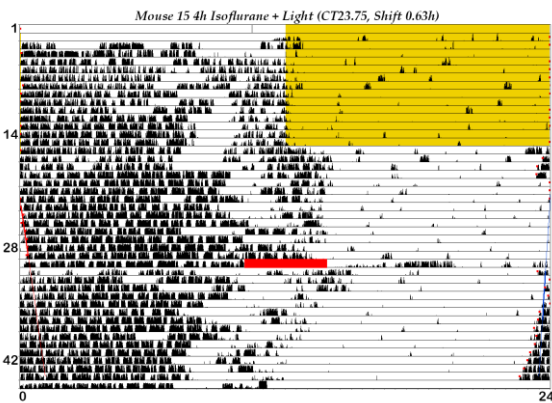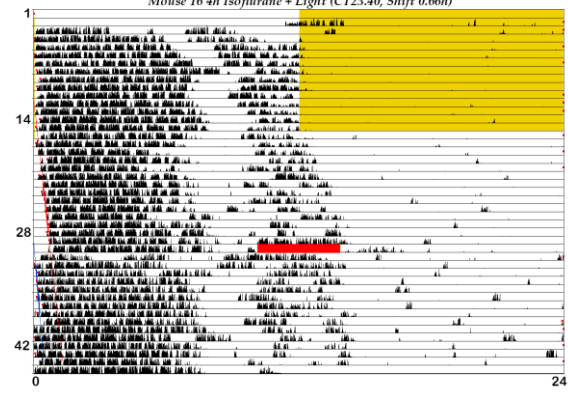



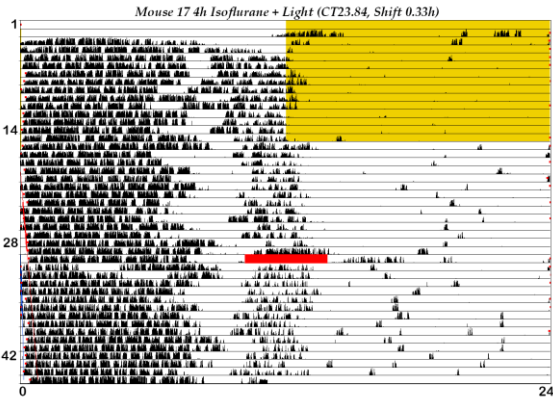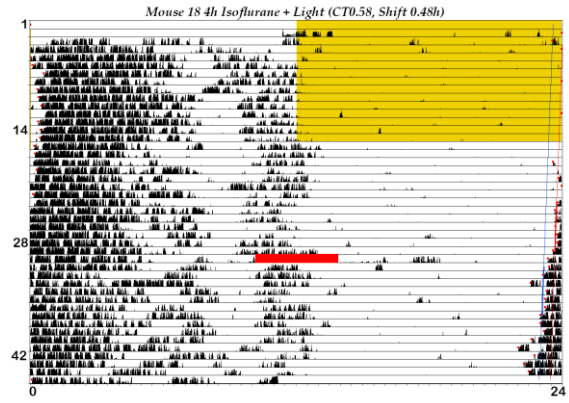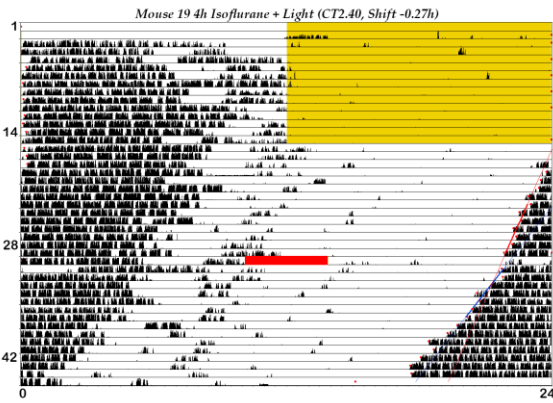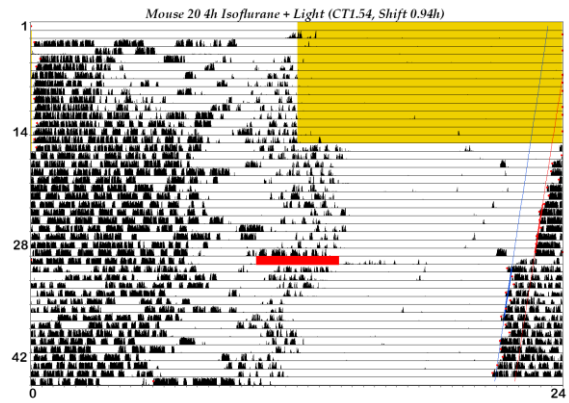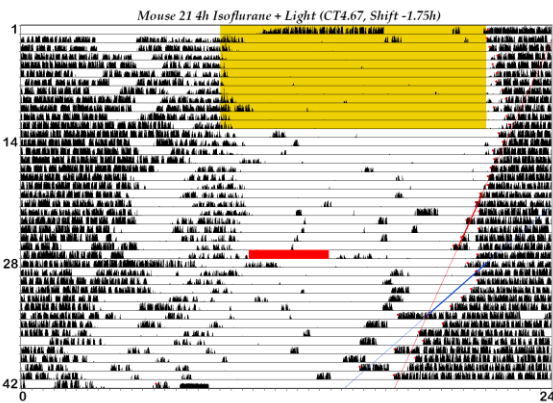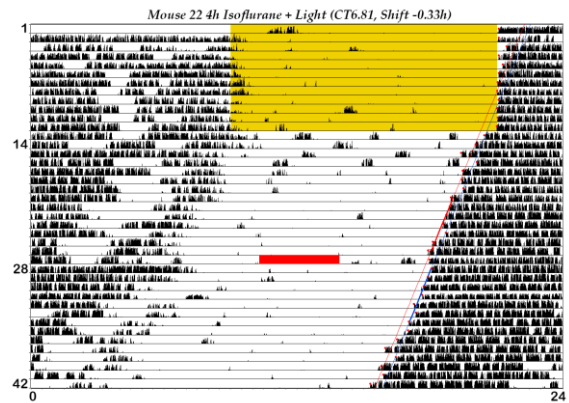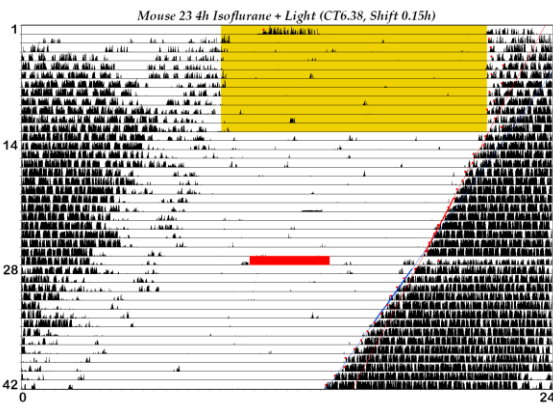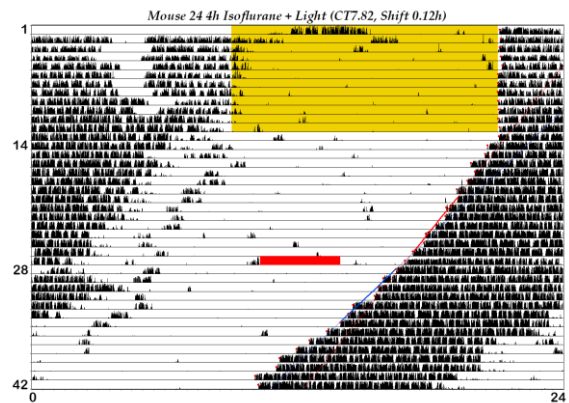

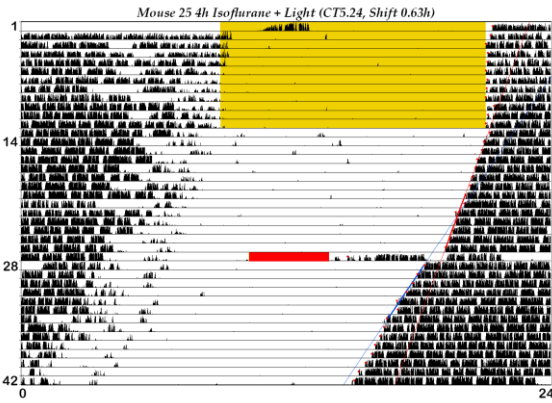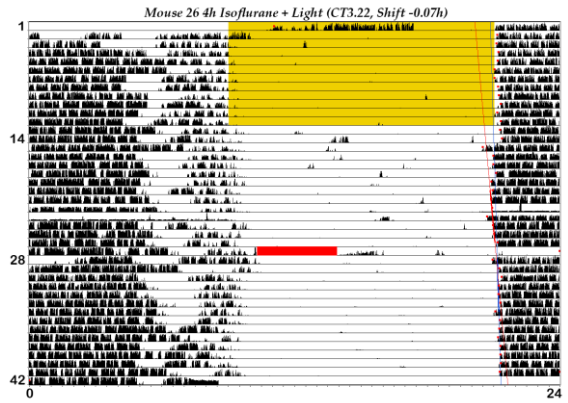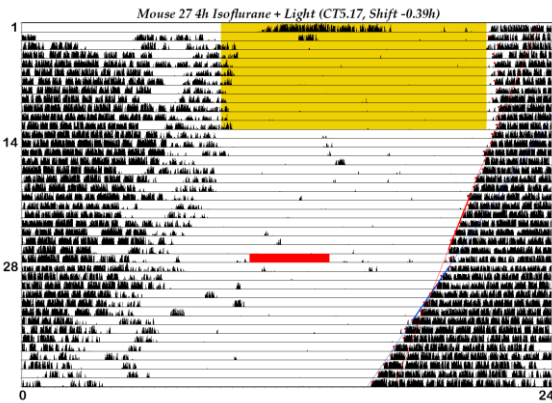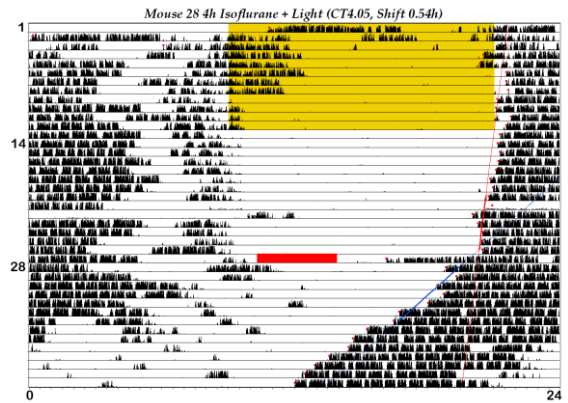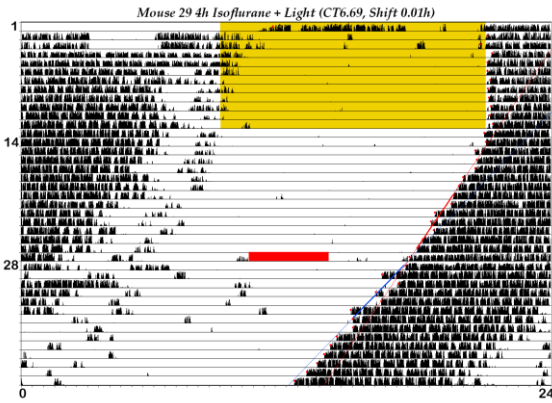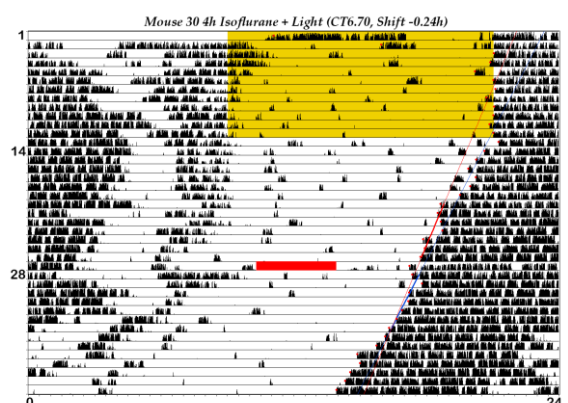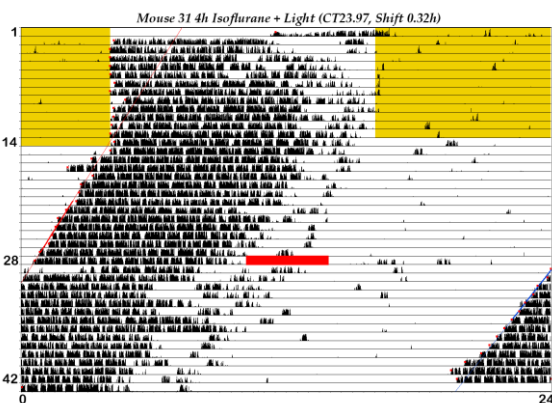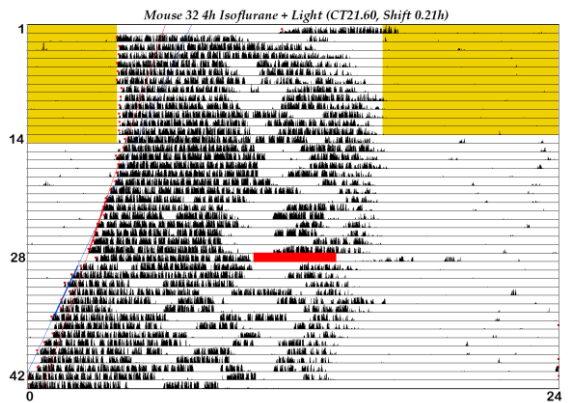



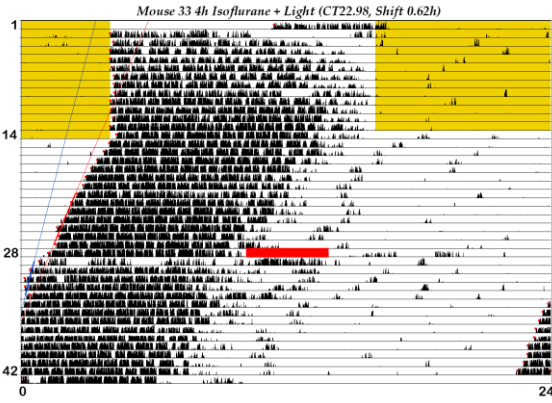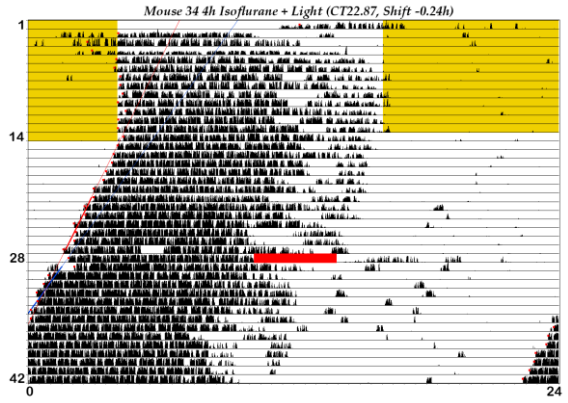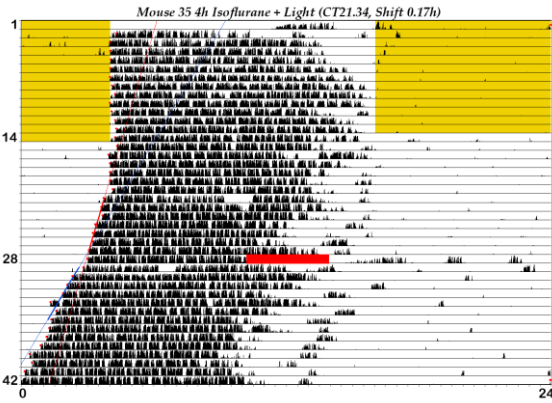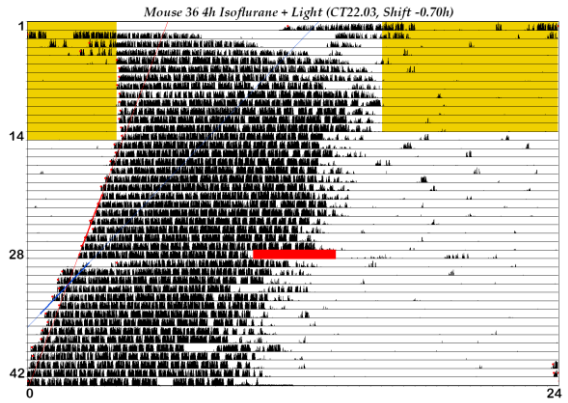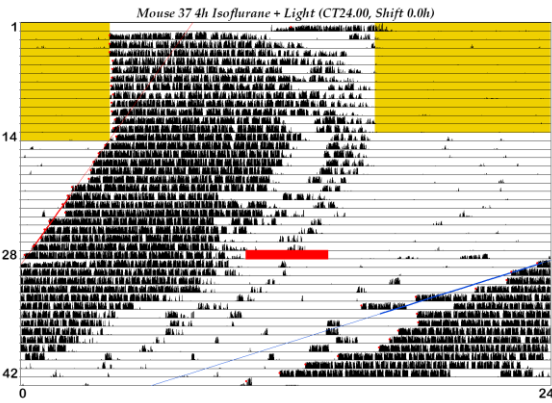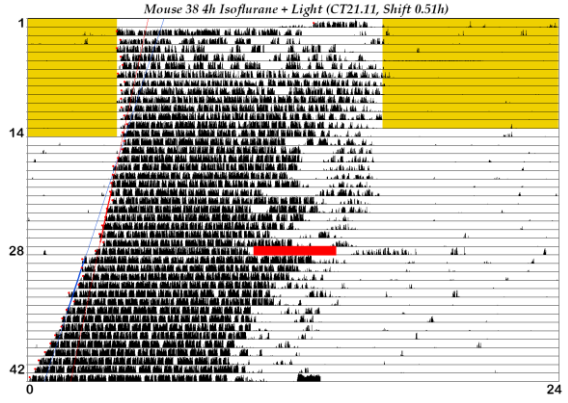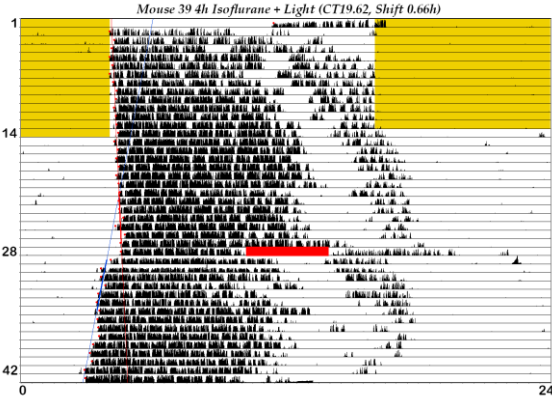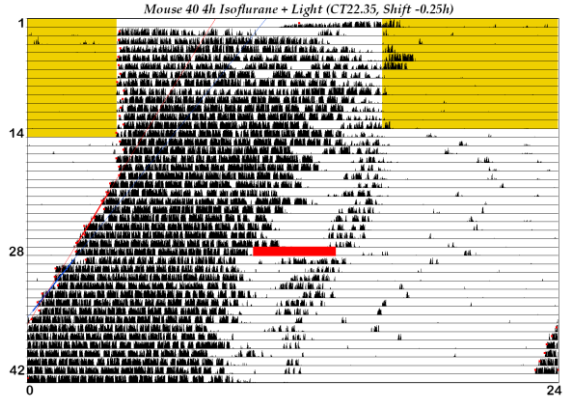

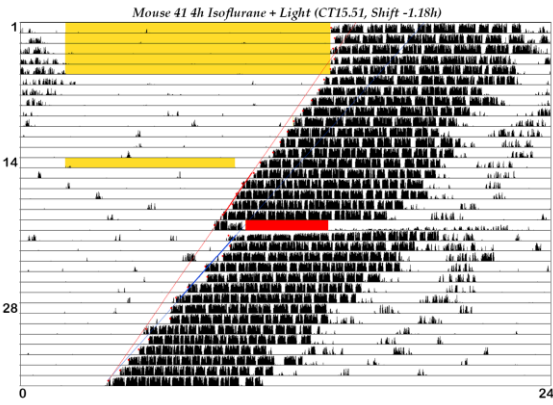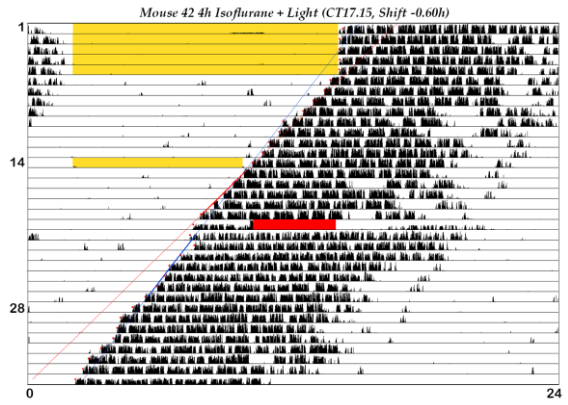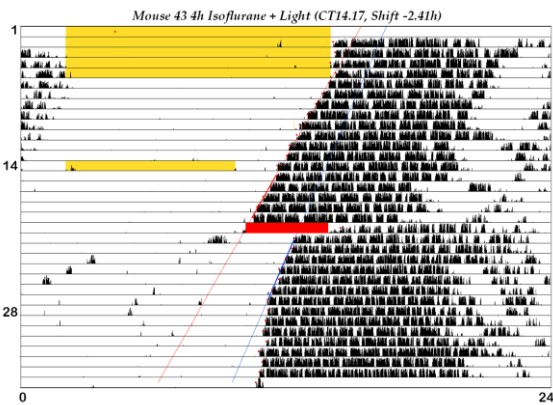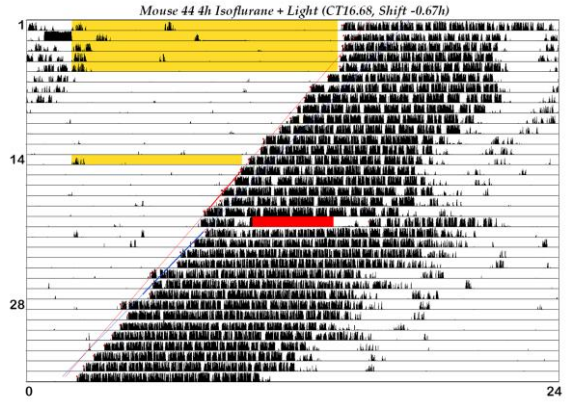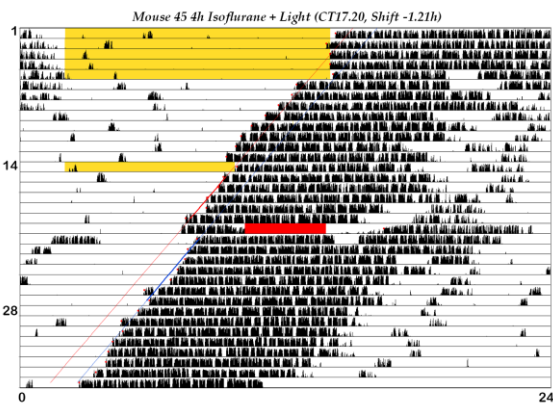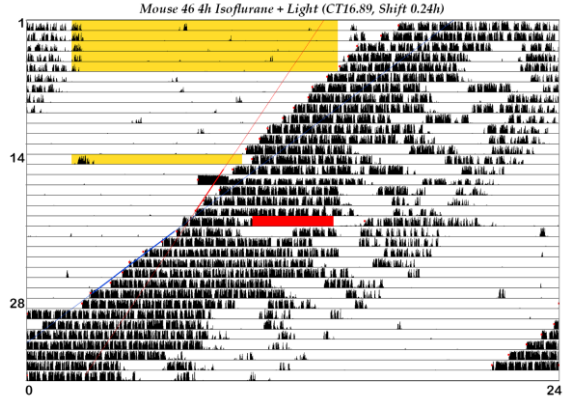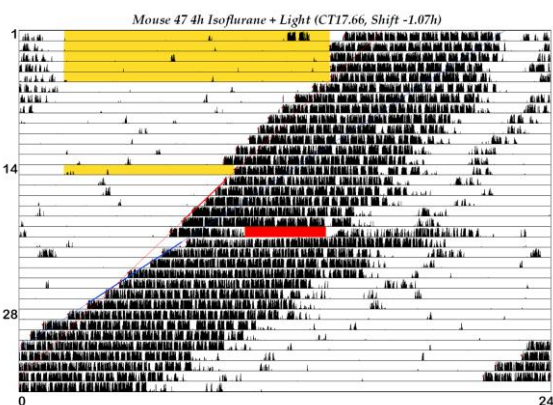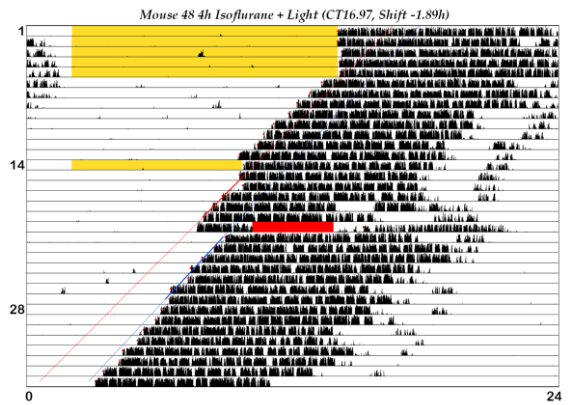



Mouse 49 4h Isoflurane + Light (CT20.83, Shift -0.93h)

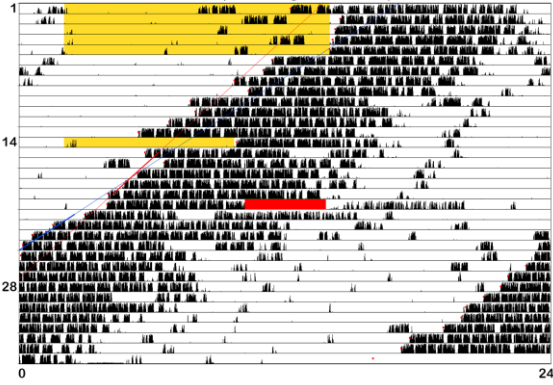

Mouse 50 4h Isoflurane + Light (CT14.36, Shift -2.70h)

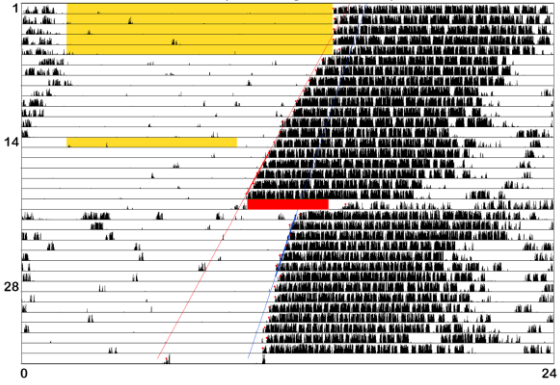

Mouse 51 4h Isoflurane + Light (CT16.78, Shift -0.61h)

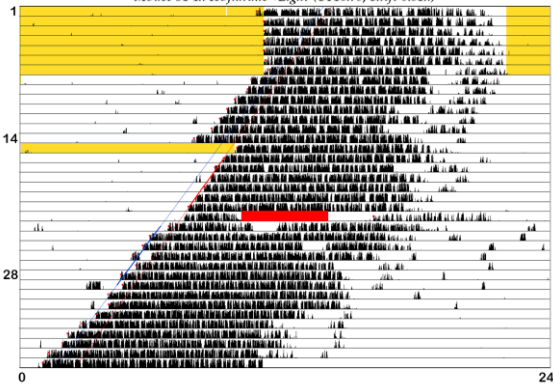

Mouse 52 4h Isoflurane + Light (CT15.79, Shift -2.05h)

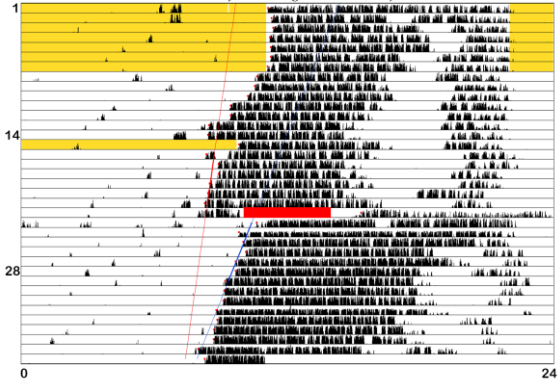

Mouse 53 4h Isoflurane + Light (CT18.20, Shift -0.41h)

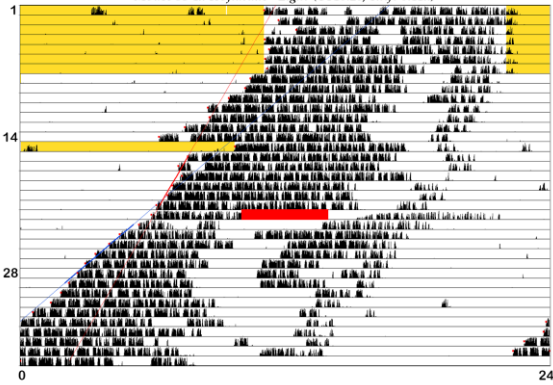

Mouse 54 4h Isoflurane + Light (CT15.27, Shift -1.69h)

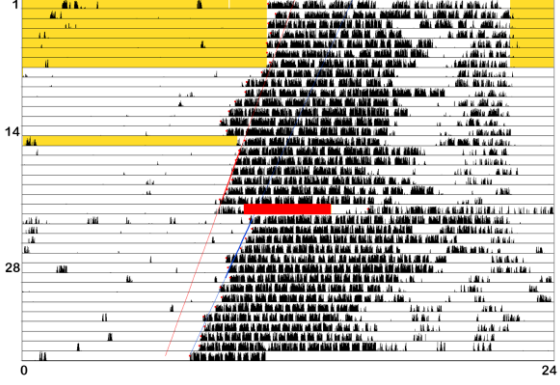

Mouse 55 4h Isoflurane + Light (CT16.84, Shift -0.97h)

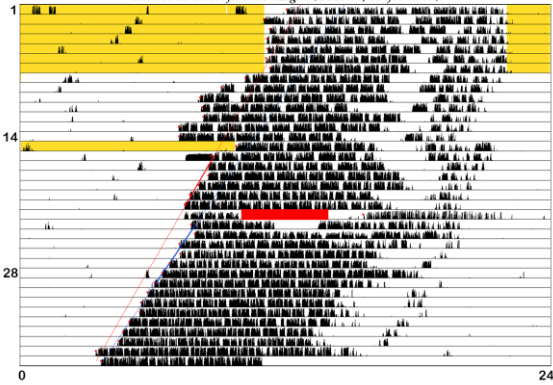

Mouse 56 4h Isoflurane + Light (CT16.50, Shift -0.14h)

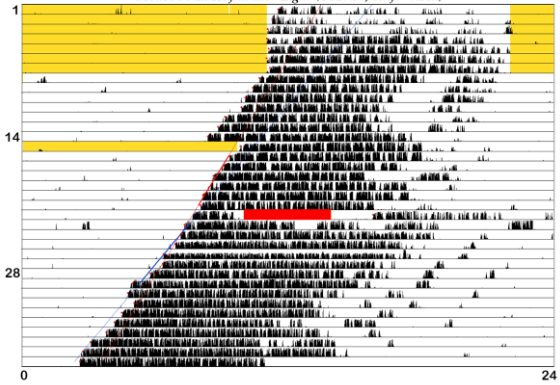

Mouse 57 4h Isoflurane +Light (CT14:97, Shift -1.17h)

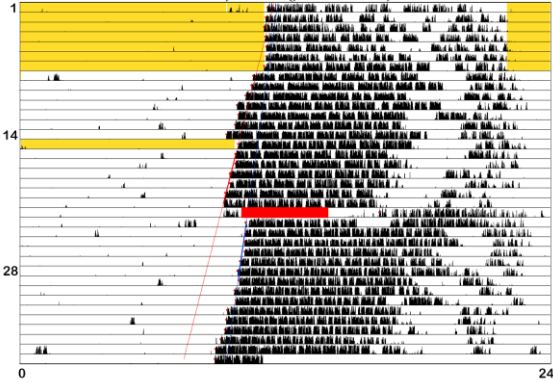

Mouse 58 4h Isoflurane +Light (CT16:64, Shift -0.04h)

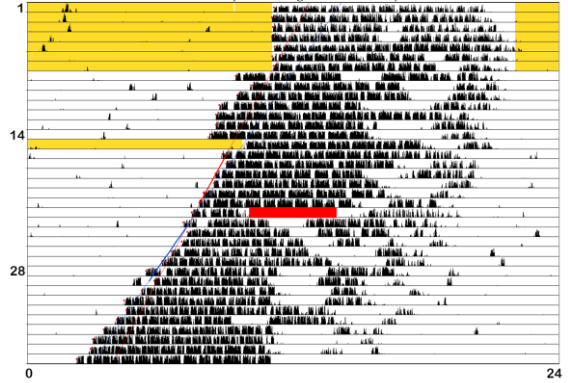

Mouse 59 4h Isoflurane +Light (CT16:87, Shift -0.68h)

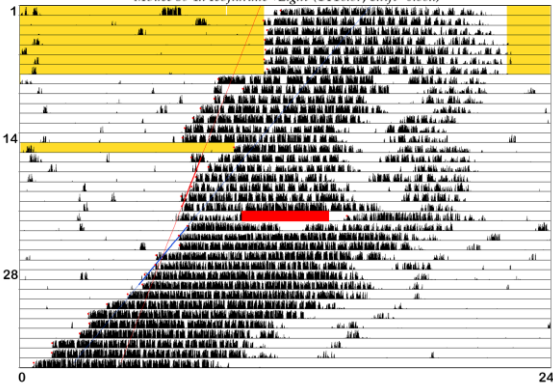

Mouse 60 4h Isoflurane +Light (CT17:02, Shift -1.00h)

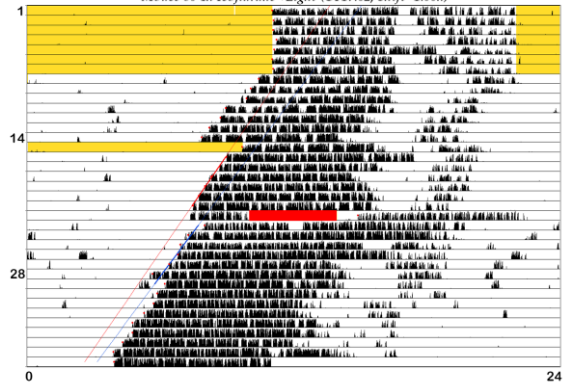

Supplement: s1 [file s1]
