# Supplementary material for: The Effects of General Anaesthesia and Light on Behavioural Rhythms and GABAA Receptor Subunit Expression in the Mouse SCN
Source: MDPI journal article supplement (doi:10.3390/clockssleep3030034), 2021-09-17
Supplement: s1 [file s1]

**Table S2:** Table of Behavioural Phase shifts of C57 BL6/VJU mice exposed to light

| Animal # | CT    | GA        |
|----------|-------|-----------|
|          |       | Shift (h) |
| 61       | 9.16  | 0.51      |
| 62       | 10.03 | -0.2      |
| 63       | 7.86  | -0.37     |
| 64       | 8.14  | 1.25      |
| 65       | 8.17  | 0.89      |
| 66       | -     | -         |
| 67       | 8.78  | 0.19      |
| 68       | 8.26  | 0.64      |
| 69       | 9.83  | 0.09      |
| 70       | 8.56  | 0.87      |
| 71       | 2.18  | 0.16      |
| 72       | 0.65  | 1.01      |
| 73       | 2.04  | 0.24      |
| 74       | 1.64  | 0.52      |
| 75       | 1.06  | 0.82      |
| 76       | 3.11  | 0.28      |
| 77       | 3.24  | 0.01      |
| 78       | 3.83  | -0.07     |
| 79       | 2.32  | 0.35      |
| 80       | 1.08  | 0.49      |
| 81       | 4.71  | 0.65      |
| 82       | 4.52  | -0.15     |
| 83       | 4.81  | 0.12      |
| 84       | 6.08  | 1.22      |
| 85       | 5.94  | 0.76      |
| 86       | 6.25  | 0.73      |
| 87       | 6.63  | -0.27     |
| 88       | 7.35  | 0.56      |
| 89       | 6.75  | -0.2      |
| 90       | 4.38  | 0.55      |
| 91       | 22.41 | 0.14      |
| 92       | 18.89 | -1.87     |
| 93       | 22.00 | 0.04      |
| 94       | 20.35 | -5.02     |
| 95       | 20.87 | 0.16      |
| 96       | 21.24 | -1.06     |
| 97       | 0.36  | -0.54     |
| 98       | 19.59 | -4.83     |
| 99       | 20.81 | -0.85     |
| 100      | 20.23 | -0.99     |
| 101      | 16.74 | -4.2      |
| 102      | 15.66 | -3.05     |
| 103      | 18.02 | -3.54     |
| 104      | 15.18 | -4.57     |
| 105      | 16.87 | -3.61     |
| 106      | 16.34 | -4.19     |
| 107      | 15.07 | -3.22     |
| 108      | 16.44 | -3.33     |
| 109      | 16.82 | -2.91     |
| 110      | 16.89 | -3.23     |

|     |       |       |
|-----|-------|-------|
| 111 | 17.65 | -3.13 |
| 112 | 14.67 | -2.55 |
| 113 | 16.68 | -2.75 |
| 114 | 14.94 | -3.05 |
| 115 | 16.86 | -2.78 |
| 116 | 16.05 | -3.36 |
| 117 | -     | -     |
| 118 | 18.58 | -1.85 |
| 119 | 18.04 | -3.48 |
| 120 | 15.94 | -2.86 |
