# Supplementary material for: The Effects of General Anaesthesia and Light on Behavioural Rhythms and GABAA Receptor Subunit Expression in the Mouse SCN
Source: MDPI journal article supplement (doi:10.3390/clockssleep3030034), 2021-09-17
Supplement: s1 [file s1]

**Table S1:** Table of Behavioural Phase shifts of C57 BL6/VJU mice exposed to GA (isoflurane) + Light

| Animal # | CT    | GA        |
|----------|-------|-----------|
|          |       | Shift (h) |
| 1        | 11.98 | -1.5      |
| 2        | 7.92  | -0.31     |
| 3        | 9.50  | -0.29     |
| 4        | 8.97  | -0.07     |
| 5        | 9.69  | -0.68     |
| 6        | 10.60 | -0.6      |
| 7        | 8.50  | 0.14      |
| 8        | 8.92  | -0.25     |
| 9        | 8.53  | 0.6       |
| 10       | 8.02  | -4.7      |
| 11       | 3.34  | -0.35     |
| 12       | 23.91 | 0.05      |
| 13       | 3.03  | 0.2       |
| 14       | 2.59  | -0.27     |
| 15       | 23.75 | 0.63      |
| 16       | 23.4  | 0.66      |
| 17       | 23.84 | 0.33      |
| 18       | 0.58  | 0.48      |
| 19       | 2.40  | -0.27     |
| 20       | 1.54  | 0.94      |
| 21       | 4.67  | -1.75     |
| 22       | 6.81  | -0.33     |
| 23       | 6.38  | 0.15      |
| 24       | 7.82  | 0.12      |
| 25       | 5.24  | 0.63      |
| 26       | 3.22  | -0.07     |
| 27       | 5.17  | -0.39     |
| 28       | 4.05  | 0.54      |
| 29       | 6.69  | 0.01      |
| 30       | 6.70  | -0.24     |
| 31       | 23.97 | 0.32      |
| 32       | 21.60 | 0.21      |
| 33       | 22.98 | 0.62      |
| 34       | 22.87 | -0.24     |
| 35       | 21.34 | 0.17      |
| 36       | 22.03 | -0.7      |
| 37       | 24    | 0         |
| 38       | 21.11 | 0.51      |
| 39       | 19.62 | 0.66      |
| 40       | 22.35 | -0.25     |
| 41       | 15.51 | -1.18     |
| 42       | 17.15 | -0.6      |
| 43       | 14.17 | -2.41     |
| 44       | 16.68 | -0.67     |
| 45       | 17.20 | -1.21     |
| 46       | 16.89 | 0.24      |
| 47       | 17.66 | -1.07     |
| 48       | 16.97 | -1.89     |
| 49       | 20.83 | 0.93      |
| 50       | 14.36 | -2.7      |

|    |       |       |
|----|-------|-------|
| 51 | 16.78 | 0.61  |
| 52 | 15.79 | -2.05 |
| 53 | 18.20 | 0.41  |
| 54 | 15.27 | -1.69 |
| 55 | 16.84 | -0.97 |
| 56 | 16.50 | -0.14 |
| 57 | 14.97 | -1.17 |
| 58 | 16.64 | -0.04 |
| 59 | 16.87 | -0.68 |
| 60 | 17.03 | -1    |
